# Supplementary material
Source: PubMed Central journal article supplement (PMC7141963)
Supplement: NIHMS1556242-supplement-2.pdf [file NIHMS1556242-supplement-2.pdf]

Supplementary Figure

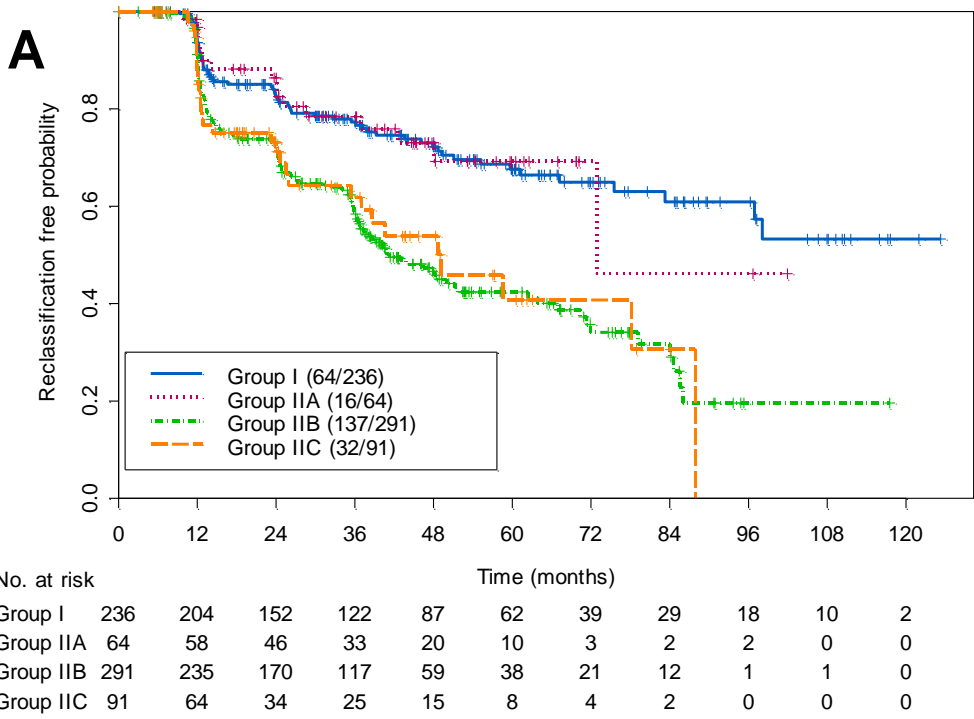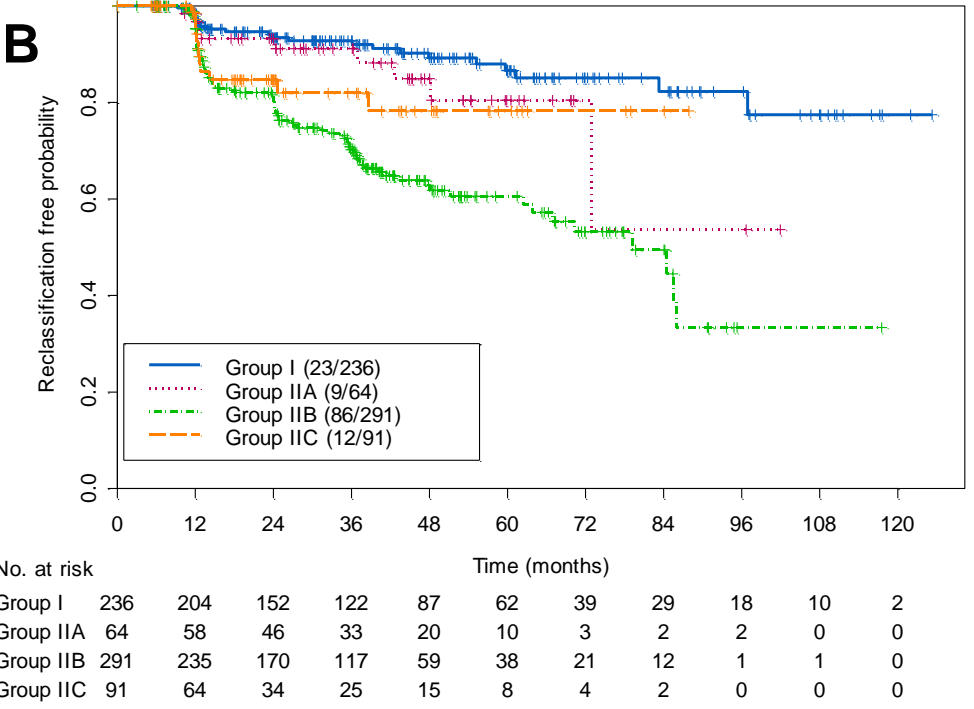

Figure – Kaplan-Meier curves comparing time to reclassification by increase in tumor volume and upgrade of Gleason score. A) Time to reclassification based on tumor volume increase or grade group increase, by baseline group stratification. B) Time to reclassification based on grade group increase only, by baseline group stratification.  $P < 0.001$  when comparing time to reclassification or grade group increase in Group I/IIa vs. IIb/IIc in both curves using log rank testing. Please see methods for “Group” definitions.
